# Supplementary material
Source: PubMed Central journal article supplement (PMC3811449)
Supplement: AAC.00130-13_zac010132240so1.pdf [file AAC.00130-13_zac010132240so1.pdf]

Figure S1

A

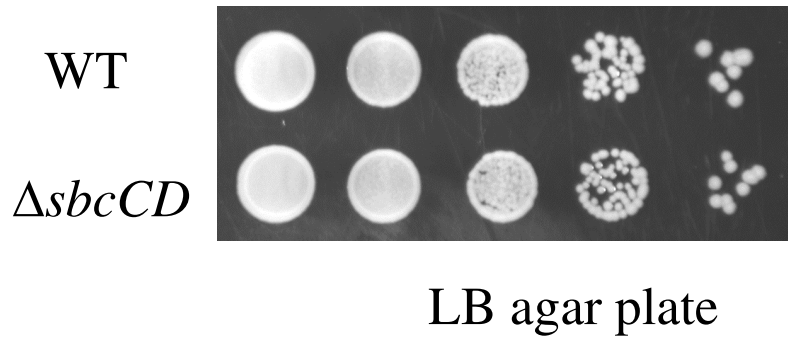

B

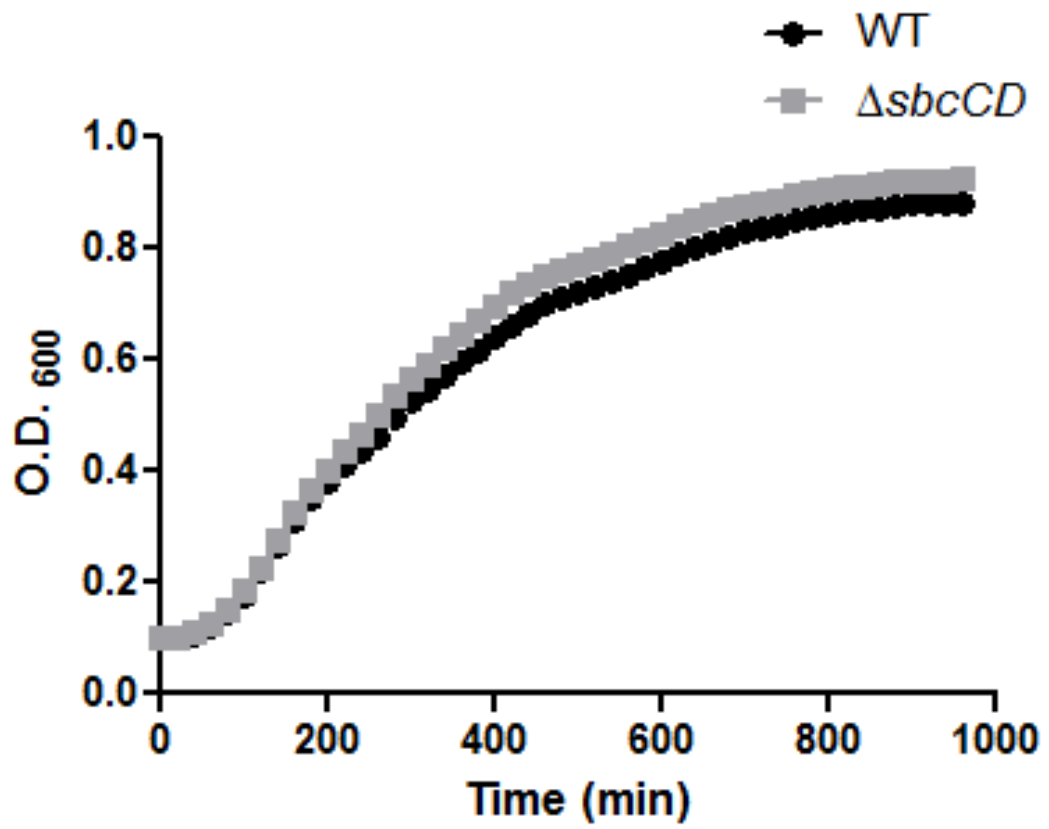

**Figure S1. Growth of wild type and  $\Delta sbcCD$  mutant in the absence of quinolones.** (A) Overnight cultures were adjusted to an optical density at 600 nm [ $OD_{600}$ ] = 1. Ten fold serial dilutions in saline solution were done and five microliters of each serial dilution were spotted on antibiotic free LB agar plates. (B) Overnight cultures were diluted 1:100 in LB medium and 100  $\mu$ l loaded onto a clear 96 well plate. Optical density at 600 nm was monitored for 16 h at 37°C using the BioTek Synergy HT plate reader.
